# Supplementary material
Source: MDPI journal article supplement (https://www.mdpi.com/1999-4907/13/7/1140)
Supplement: s1 [file s1]

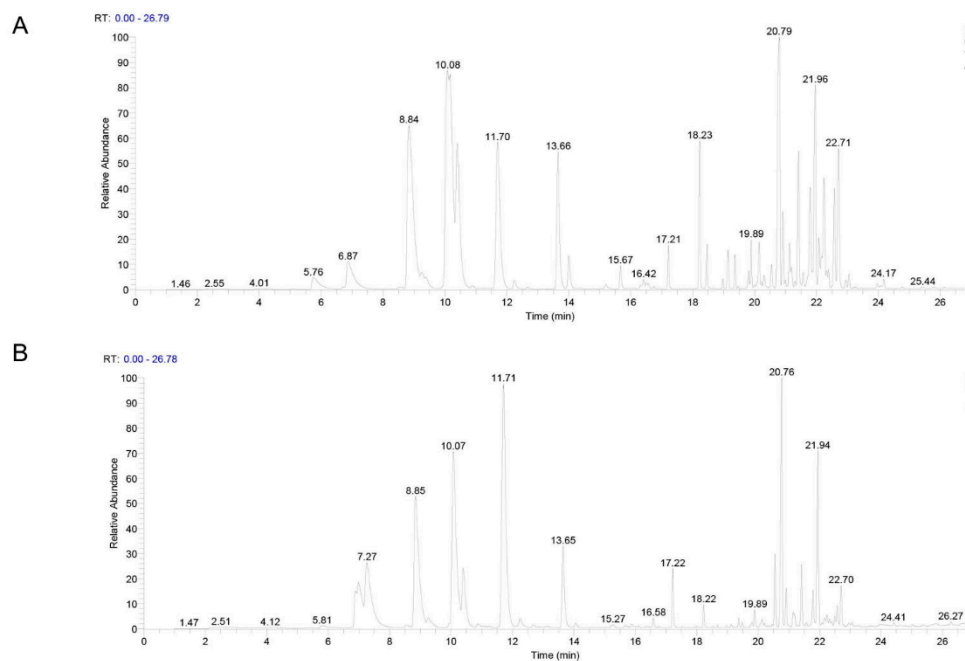

Supplement Figure S1: GC-MC chromatogram of *P. thunbergii* with different levels of resistance at 24 h after inoculation with PWN (A) resistant *P. thunbergii* (B) susceptible *P. thunbergii*;

Table S1: Sepcific primers used in this study

| Primer names                | Primer sequences (5'-3') |
|-----------------------------|--------------------------|
| <i>P. thunbergii</i> EF1a-F | GGGAAGCCACCCAAAGTTT      |
| <i>P. thunbergii</i> EF1a-R | TACATGGGAAGACGCCGAAT     |
| HMDH1-F                     | TTGCGCACTTGATTCCTTGC     |
| HMDH1-R                     | TGTCGTTTCGATTCCCCACTG    |
| GGPPS-F                     | AGGCACTGGAAAGGG          |
| GGPPS-R                     | AATGCACAGAACAGG          |
| PT1-F                       | ACACCTTCGGAACGATGGAC     |
| PT1-R                       | TCTCCGCCTCTCTAGCCATT     |
| PT2-F                       | ACGTGAGAATGGGTTGCAGT     |
| PT2-R                       | AAAGTGGATGTCCAGCGGTT     |

Table S2: Differences in volatile matter content of differentially resistant *P. thunbergii* after inoculation with PWNs.

| Terpenoids |                            | Percentage content of volatile matter in needles at different inoculation times (%) |                                  |                                |                                  |                                |                                  |                                |                                  |
|------------|----------------------------|-------------------------------------------------------------------------------------|----------------------------------|--------------------------------|----------------------------------|--------------------------------|----------------------------------|--------------------------------|----------------------------------|
|            |                            | 0h                                                                                  |                                  | 24h                            |                                  | 72h                            |                                  | 168h                           |                                  |
|            |                            | Resistant <i>P. thunbergia</i>                                                      | Susceptible <i>P. thunbergia</i> | Resistant <i>P. thunbergia</i> | Susceptible <i>P. thunbergia</i> | Resistant <i>P. thunbergia</i> | Susceptible <i>P. thunbergia</i> | Resistant <i>P. thunbergia</i> | Susceptible <i>P. thunbergia</i> |
| 1          | ricyclene                  | 7.85                                                                                | 0.11                             | 7.15                           | 18.78                            | 0.12                           | 0.3                              | 0.1                            | 0.18                             |
| 2          | $\alpha$ -Pinene           | 9.61                                                                                | 7.93                             | 11.77                          | 10.7                             | 15.06                          | 15.01                            | 16.12                          | 16.44                            |
| 3          | Camphene                   | 0.22                                                                                | 0.15                             | 0.56                           | 0.47                             | 0.58                           | 1.13                             | 0.75                           | 0.75                             |
| 4          | Terpinolene                | 6.94                                                                                | 4.13                             | 5.95                           | 4                                | 6.31                           | 4.54                             | 6.49                           | 3.1                              |
| 5          | $\beta$ -Pinene            | 9.61                                                                                | 15.27                            | 10.43                          | 15.72                            | 14.74                          | 21.49                            | 16.37                          | 19.79                            |
| 6          | $\beta$ -Myrcene           | 4.27                                                                                | 1.84                             | 4.33                           | 2.21                             | 5.94                           | 2.7                              | 5.85                           | 3.43                             |
| 7          | $\alpha$ -Phellandrene     | 0.1                                                                                 | 0.16                             | 0.1                            | 0.2                              | 0.24                           | 0.3                              | 0.27                           | 0.28                             |
| 8          | $\beta$ -cis-Ocimene       | 0.88                                                                                | 0.18                             | 0.34                           | 0.53                             | 11.07                          | 17.28                            | 11.74                          | 13.05                            |
| 9          | $\gamma$ -Terpinene        | 0.11                                                                                | 0.08                             | 0.21                           | 0.14                             | 0.17                           | 0.32                             | 0.2                            | 0.29                             |
| 10         | Linalool                   | 0.5                                                                                 | -                                | 1.14                           | -                                | 1.27                           | 0.06                             | 1.87                           | 0.24                             |
| 11         | trans-3-Pinanone           | 0.27                                                                                | 0.06                             | 0.08                           | 0.11                             | 0.64                           | 0.24                             | 0.87                           | 0.58                             |
| 12         | $\beta$ -Elemene           | 1.75                                                                                | 1.09                             | 1.2                            | 1.73                             | 1                              | 0.26                             | 0.88                           | 1.06                             |
| 13         | $\beta$ -Cyclogermacrene;  | 1.28                                                                                | 0.38                             | 0.97                           | 0.59                             | 0.66                           | 2.88                             | 0.6                            | 2.68                             |
| 14         | $\alpha$ -Cubebene         | 1.41                                                                                | 0.68                             | 1.07                           | 1.09                             | 0.64                           | 0.9                              | 0.64                           | 0.41                             |
| 15         | Ylangene                   | 0.42                                                                                | 0.32                             | 0.36                           | 0.23                             | 0.27                           | 0.19                             | 0.25                           | 0.18                             |
| 16         | Longifolene                | 0.6                                                                                 | 1.99                             | 0.63                           | 1.27                             | 0.61                           | 0.68                             | 0.82                           | 0.36                             |
| 17         | Caryophyllene              | 15.71                                                                               | 18.4                             | 15.06                          | 16.8                             | 13.12                          | 18.87                            | 12.82                          | 17.36                            |
| 18         | epi- $\beta$ -Caryophyllen | -                                                                                   | -                                | 1.31                           | -                                | 1.21                           | -                                | 1.19                           | 3.89                             |
| 19         | $\alpha$ -Muurolene        | -                                                                                   | 2.5                              | -                              | 0.27                             |                                | 0.58                             |                                | 2.39                             |
| 20         | $\gamma$ -Muurolene        | 2.12                                                                                | 10.07                            | 1.63                           | 7.39                             | 3.84                           | 3.49                             | 3.64                           | 2.77                             |
| 21         | Germacrene D               | 6.95                                                                                | 8.95                             | 6.23                           | 8.82                             | 5.01                           | 9.99                             | 7.91                           | 10.55                            |
| 22         | Germacrene B;              | 5.38                                                                                | -                                | 2.71                           | -                                | -                              | -                                | -                              | -                                |
| 23         | Alloaromadendrene          | 1.73                                                                                | -                                | 1.46                           | -                                | -                              | -                                | -                              | -                                |
| 24         | cis-Muurola-4(15),5-diene  | 0.15                                                                                | 0.23                             | 0.19                           | 0.23                             | 0.17                           | 0.26                             | 0.15                           | 0.18                             |
| 25         | $\gamma$ -Cadinene         | 11.46                                                                               | 2.89                             | 9.82                           | 2.82                             | 5.47                           | 2.83                             | 5.02                           | 2.43                             |
| 26         | $\alpha$ -Cadinene         | 0.47                                                                                | 0.29                             | 0.38                           | 0.44                             | 0.25                           | 0.24                             | 0.21                           | 0.14                             |
| 27         | (-)- $\beta$ -Cadinene     | -                                                                                   | 4.39                             | -                              | 4.7                              | 1.18                           | 4.47                             | -                              | 4.03                             |
| 28         | $\beta$ -Selinene          | 1.52                                                                                | 0.57                             | 0.73                           | 0.12                             | -                              | -                                | 1.04                           | 1.17                             |
| 29         | Cubenene                   | 0.09                                                                                | 0.17                             | 0.16                           | 0.16                             | 1.06                           | 0.13                             | 0.78                           | 0.09                             |
| 30         | Caryophyllene oxide        | 0.16                                                                                | 0.16                             | 0.3                            | 0.09                             | 0.12                           | -                                | 0.11                           | -                                |
| 31         | $\alpha$ -Terpineol        | -                                                                                   | -                                | 0.18                           | -                                | 0.24                           | -                                | 0.29                           | -                                |
| 32         | Myrtenal                   | -                                                                                   | -                                | -                              | -                                | 0.12                           | -                                | 0.15                           | -                                |
| 33         | Dehydrosabinene            | 0.63                                                                                | -                                | 0.59                           | -                                | 0.43                           | -                                | 0.36                           | -                                |
| 34         | Pseudolimonen              | 10.37                                                                               | -                                | 9.27                           | -                                | 7.63                           | -                                | -                              | -                                |
| 35         | 3-Carene                   | 0.83                                                                                | 0.17                             | -                              | 0.18                             | -                              | -                                | -                              | -                                |
| 36         | Valencen                   | 1.99                                                                                | 1.83                             | -                              | 1.74                             | 5.83                           | -                                | 5.01                           | -                                |
| 37         | Bicylogermacrene           | 4.06                                                                                |                                  | 0.62                           | -                                | 0.22                           | -                                | 0.2                            | -                                |

|    |                   |       |      |   |      |        |      |       |   |
|----|-------------------|-------|------|---|------|--------|------|-------|---|
| 38 | $\alpha$ -Thujene | 10.82 | 0.22 | - | 5.52 | 14.14- | -    | 9.1   | - |
| 39 | Sabinen           | -     | -    | - | -    | 15.9   | -    | 18.89 | - |
| 40 | Benzene, n-butyl- | -     | -    | - | -    | 0.37   | -    | 0.3   | - |
| 41 | Borneol           |       | -    | - | 0.14 | -      | 0.12 | -     | - |
